# Supplementary material for: Phylogenomic investigation of an outbreak of fluoroquinolone-resistant Salmonella enterica subsp. enterica serovar Paratyphi A in Phnom Penh, Cambodia
Source: PubMed Central journal article supplement (PMC10132074; doi:10.1099/mgen.0.000972), 2023-03-24
Supplement: mgen-9-972-s001.pdf [file mgen-9-972-s001.pdf]

**Figure S1:** Date-randomization test. We repeated our BEAST2 analysis 20 times with identical model settings but with randomly reshuffled sampling dates. A dataset is considered to have strong temporal structure if the rate estimate obtained using the genuine sampling times is not contained within the range of values from the randomized permutations.

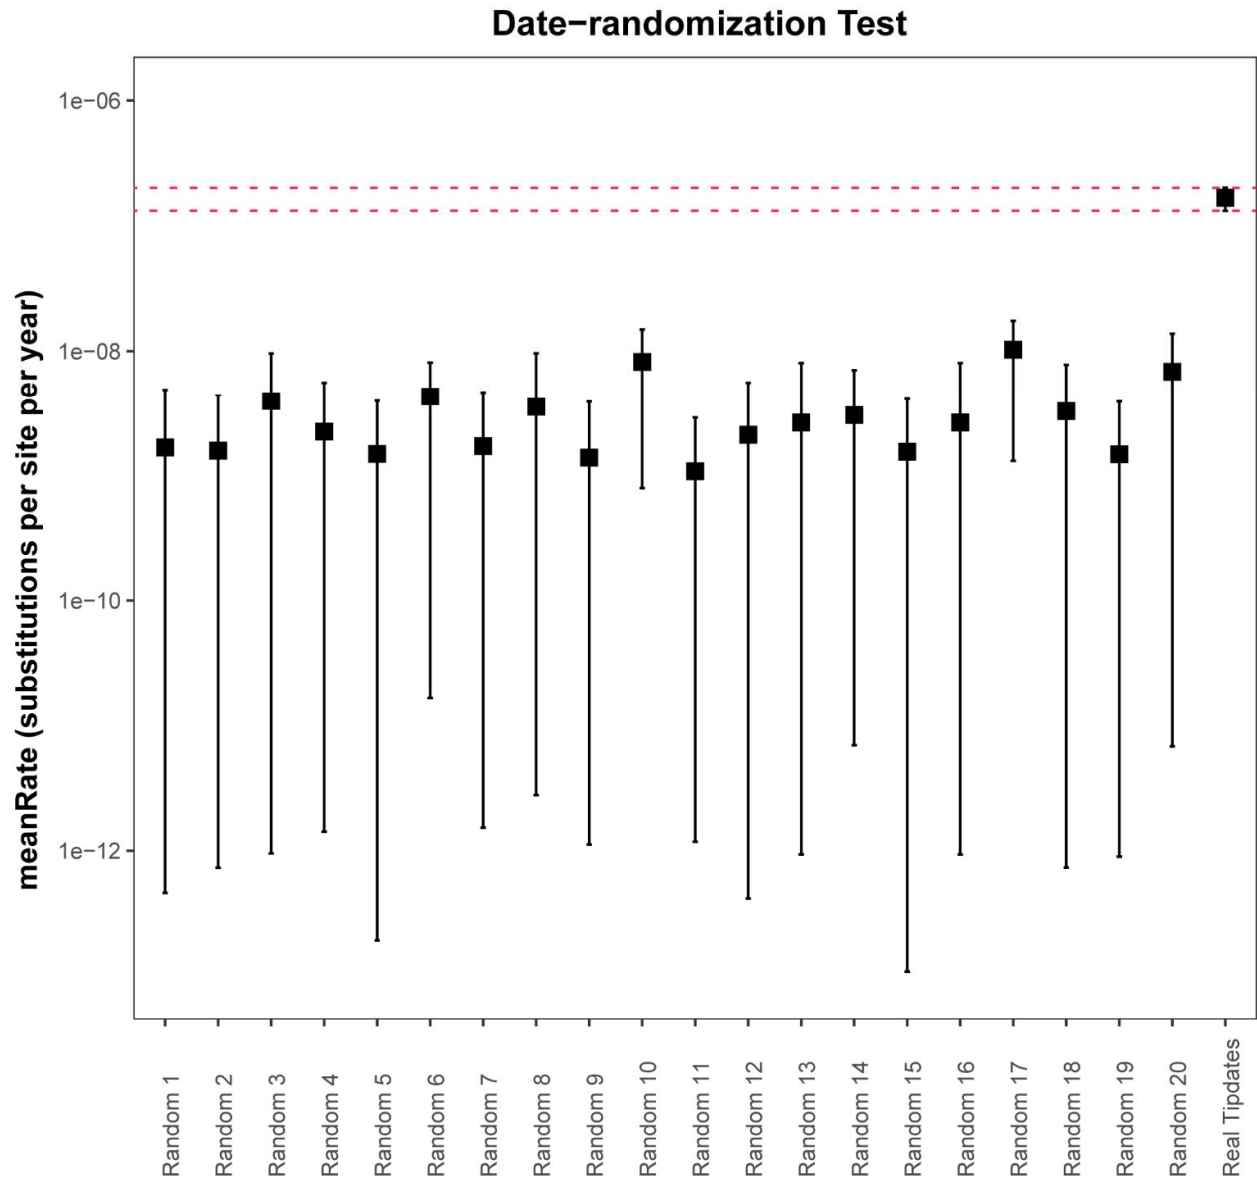

**Figure S2:** ML-tree of 558 Paratyphi A lineage 2.3 isolates detailing relatedness, geographical origin, and year of isolation of all analyzed strains.
